# Supplementary material for: Incidence and Prognostic Significance of the Segond Fracture in Patients Undergoing Anterior Cruciate Ligament Reconstruction
Source: PubMed Central journal article supplement — Am J Sports Med. 2020 Mar 2;48(5):1063–8. doi: 10.1177/0363546520905557 (PMC7163245; doi:10.1177/0363546520905557), 2020-03-02

APPENDIX:

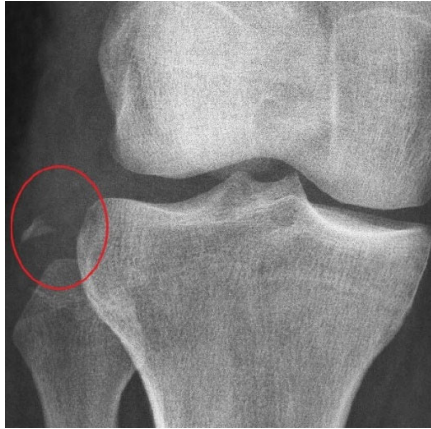

Figure A1 – Segond fracture on coronal radiograph

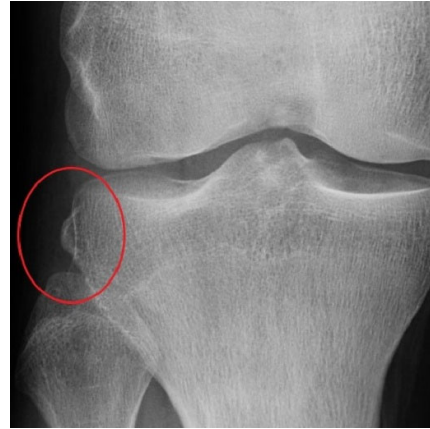

Figure A2 – “Healed Segond” on coronal radiograph

Figure A3 – Healing of identified Segond fractures

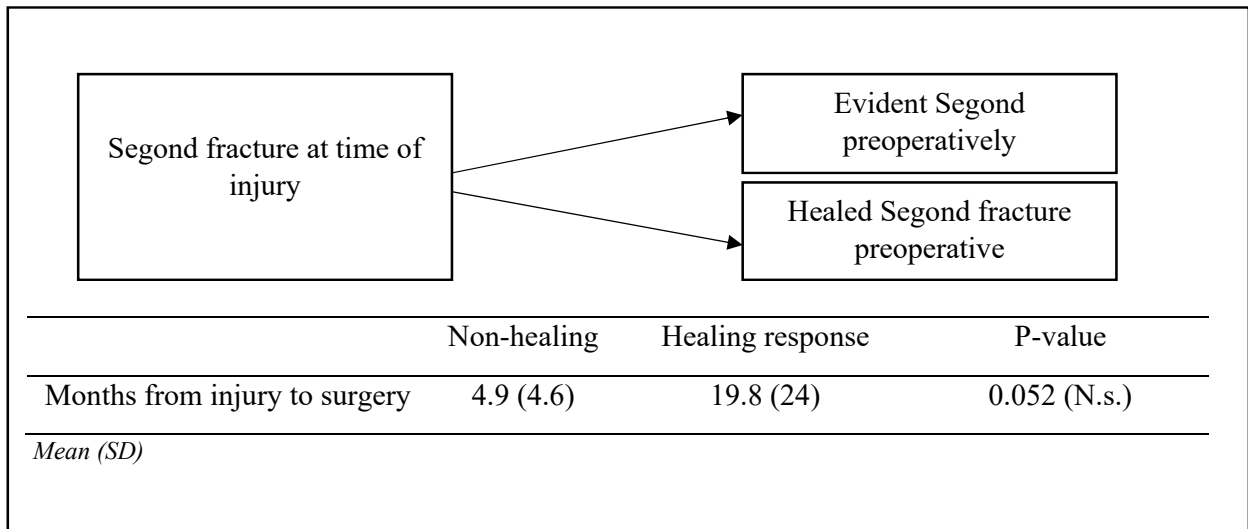

Supplement: DS_10.1177_0363546520905557.pdf [file DS_10.1177_0363546520905557.pdf]
